discipline concerned with pain and hypnosis. It is hoped that the authors, who are eminently qualified to do so, will write a sequel covering in detail the psychological aspects of hypnosis and its use in psychotherapy for pain and other conditions.

HERBERT S. RIPLEY, M.D.  
*Psychiatry and Behavioral Sciences  
University Hospital  
Seattle, Washington 98195*

**Pulmonary Physiology of the Fetus, Newborn and Child.** By E. H. SCARPELLI. Philadelphia, Lea and Febiger, 1975. Pages: 369. Price: \$35.00.

In the past 15 years, a marked change in the care of the sick fetus, infant and child with pulmonary abnormalities has occurred because clinicians and scientists around the world have actively gathered information on normal and abnormal pulmonary physiology during these three stages of life. For the first time, these data have been brought into perspective in a readable and coherent publication by a group of scientists and clinicians actively engaged in research and clinical care.

The organization of the book is logical and orderly. It begins with an overview of physiology, morphology, biochemistry and fetal homeostasis. Then, it discusses the respiratory and pulmonary physiology of the fetus, newborn and child and the regulation of breathing. In contrast to most books in the field, considerable time is devoted to the non-ventilatory functions of the lung, defense mechanisms of the respiratory system, liquid balance in the lung, and pulmonary edema. The normal pulmonary circulation and the relationships of the pulmonary and renal systems are also discussed. A chapter on immunology is a welcome addition and

one missing from most books of this type. The book ends with a succinct, clear discussion of the techniques of measuring pulmonary functions in infants and children.

While this book brings together the present body of knowledge related to the field, it also points out the large gaps in that body of knowledge. One is left with many questions that hopefully will be answered during the next decade and a half. This book should not only be part of the library of all who are interested in the field, but should be read by them.

GEORGE A. GREGORY, M.D.  
*Department of Anesthesia  
University of California  
San Francisco, California 94143*

**Chinese Medical Journal, New Series Volume 1.** Nos. 1-6, 1975. Chinese Medical Association, Peking.

This bimonthly journal is published by the Chinese Medical Association and is written entirely in English, except that Chinese and Russian bibliographical references are printed in the original language without translation. "With Marxism-Leninism-Mao Tsetung Thought as its guiding principles" it publishes articles on policies and achievements in the medical domain, and on progress in medical research. The journal is well produced and scholarly, and also includes a bimonthly digest of current Chinese medical literature, as well as news, notes, and pictures of medical activities in New China. Its object is to promote academic exchange between nations and serve the people throughout the world. Volume 1 is accompanied by a special supplement containing the Constitution of the People's Republic of China. —B.R.F.

## Books Received

| Title & Edition                                                                                                                                                                                                                                                                                  | Author/Editor                        | Publisher                                                                                                  | Pages | Price   |
|--------------------------------------------------------------------------------------------------------------------------------------------------------------------------------------------------------------------------------------------------------------------------------------------------|--------------------------------------|------------------------------------------------------------------------------------------------------------|-------|---------|
|                                                                                                                                                                                                                                                                                                  |                                      | Address, Name, Year                                                                                        |       |         |
| Critical Care Medicine Handbook                                                                                                                                                                                                                                                                  | M. H. Weil<br>H. Shubin<br>(Editors) | Baltimore<br>Williams and Wilkins<br>1974                                                                  | 432   | \$18.50 |
| <i>Proceedings of the 12th Annual University of Southern California Symposium on Critical Care Medicine, consisting of 60 invited contributions covering respiratory, cardiovascular, CNS, gastrointestinal and endocrine crises, shock and trauma, fluids, infection, and special problems.</i> |                                      |                                                                                                            |       |         |
| Fundamentos de Anes-<br>tesiología<br>2a. edición                                                                                                                                                                                                                                                | G. L. Alonso                         | La Prensa Medica Mexicana<br>Paseo de las Facultades 26<br>Copilco-Universidad,<br>Mexico 10, D.F.<br>1976 | 320   | PNS     |

Written with the collaboration of Professors J. A. Aldrete and C. R. Stephen and Drs. L. P. Tamayo, J. R. Acosta and C. V. Palacios. It presents anesthesiology as a scientific and not merely a technical specialty.

Books Received (Continued)

| Title & Edition                                                                                                                                                                                                                                                                                                                                                                                                                                                 | Author/Editor                                         | Publisher                                           | Pages | Price   |
|-----------------------------------------------------------------------------------------------------------------------------------------------------------------------------------------------------------------------------------------------------------------------------------------------------------------------------------------------------------------------------------------------------------------------------------------------------------------|-------------------------------------------------------|-----------------------------------------------------|-------|---------|
|                                                                                                                                                                                                                                                                                                                                                                                                                                                                 |                                                       | Address, Name, Year                                 |       |         |
| Clinical Dental Anesthesia<br>A Manual of Principles and Practice                                                                                                                                                                                                                                                                                                                                                                                               | J. M. Bell                                            | Philadelphia<br>J. B. Lippincott<br>1976            | 176   | \$19.00 |
| <i>"... Specialist anaesthetists had to be attracted into the dental school; it was essential to modify the practice of dental anaesthesia to the point where it was acceptable to them."</i>                                                                                                                                                                                                                                                                   |                                                       |                                                     |       |         |
| Advances in Neurology<br>Volume 11: Complex Partial Seizures and Their Treatment                                                                                                                                                                                                                                                                                                                                                                                | J. Kiffin Penry<br>D. D. Daly                         | New York<br>Raven Press<br>1975                     | 486   | \$19.75 |
| <i>Reviews the most recent knowledge concerning the anatomic and physiologic basis for physcomotor seizures, with emphasis on clinical descriptions, differential diagnosis, and treatment.</i>                                                                                                                                                                                                                                                                 |                                                       |                                                     |       |         |
| Clinical Use of Drugs in Renal Failure                                                                                                                                                                                                                                                                                                                                                                                                                          | R. J. Anderson<br>J. G. Gambertoglio<br>R. W. Schrier | Springfield, Ill.<br>Charles C Thomas<br>1975       | 251   | \$19.50 |
| <i>The thirteen chapters include chapters on anticoagulants, cardiac glycosides, antihypertensive agents, diuretics, antiarrhythmic drugs, analgesics, and soporifics.</i>                                                                                                                                                                                                                                                                                      |                                                       |                                                     |       |         |
| Anesthesia for the Uninterested                                                                                                                                                                                                                                                                                                                                                                                                                                 | A. A. Birch<br>J. D. Tolmie<br>(Editors)              | Baltimore<br>University Park Press<br>1976          | 187   | PNS     |
| <i>Fundamentals enlivened by pictures.</i>                                                                                                                                                                                                                                                                                                                                                                                                                      |                                                       |                                                     |       |         |
| Anästhesie und Reanimation in der Kindeneurologie                                                                                                                                                                                                                                                                                                                                                                                                               | H. Schoeppner                                         | Leipzig<br>Veb Georg Thieme<br>1975                 | 316   | \$23.00 |
| <i>Well-illustrated information-packed survey of a rapidly progressing field, from the Humboldt University of Berlin, D. D. R.</i>                                                                                                                                                                                                                                                                                                                              |                                                       |                                                     |       |         |
| Drug Treatment of Mental Disorders                                                                                                                                                                                                                                                                                                                                                                                                                              | L. L. Simpson                                         | New York<br>Raven Press<br>1976                     | 336   | \$13.50 |
| <i>Covers basic and clinical pharmacology and therapeutic significance of the commonly used drugs.</i>                                                                                                                                                                                                                                                                                                                                                          |                                                       |                                                     |       |         |
| Hunger: Basic Mechanisms and Clinical Implications                                                                                                                                                                                                                                                                                                                                                                                                              | D. Novin<br>W. Wyrwicka<br>G. A. Bray<br>(Editors)    | New York<br>Raven Press<br>1976                     | 510   | \$34.00 |
| <i>Comprehensive multi-authored survey of research.</i>                                                                                                                                                                                                                                                                                                                                                                                                         |                                                       |                                                     |       |         |
| Journal of Advanced Nursing.<br>Vol. 1, No. 1, Jan. 1976                                                                                                                                                                                                                                                                                                                                                                                                        | J. P. Smith<br>(Editor)                               | Oxford<br>Blackwell Scientific Publications<br>1976 | 98    | \$37.50 |
| <i>This new nursing journal is an exciting and fitting introduction to the last quarter of the Twentieth Century. It aims to become an international medium for the publication of scholarly nursing papers. The journal has been developed by an Editorial Board of eminent British nurses supported by an outstanding Panel of Advisors from other countries. The first issue includes eight papers from Britain, the United States, Israel, and Denmark.</i> |                                                       |                                                     |       |         |
| Handbook of Spinal Cord Medicine<br>(Paperback)                                                                                                                                                                                                                                                                                                                                                                                                                 | D. C. Burke<br>D. D. Murray                           | New York<br>Raven Press<br>1976                     | 100   | \$ 4.95 |
| <i>Introductory pocket companion for the young resident and paramedical therapist.</i>                                                                                                                                                                                                                                                                                                                                                                          |                                                       |                                                     |       |         |

## Books Received (Continued)

| Title & Edition                                                                                                                                                                             | Author/Editor                                                          | Publisher                                                  | Pages | Price   |
|---------------------------------------------------------------------------------------------------------------------------------------------------------------------------------------------|------------------------------------------------------------------------|------------------------------------------------------------|-------|---------|
|                                                                                                                                                                                             |                                                                        | Address, Name, Year                                        |       |         |
| Chinese Medical Journal<br>Bimonthly                                                                                                                                                        | Vol. 1, 1975                                                           | Chinese Medical Association<br>Peking                      |       | PNS     |
| Behavioral Methods for Chronic<br>Pain and Illness                                                                                                                                          | M. E. Fordyce                                                          | St. Louis<br>C. V. Mosby<br>1976                           | 236   | \$ 9.50 |
| <i>Written for professional workers who study and try to help people with problems stemming from chronic illness.</i>                                                                       |                                                                        |                                                            |       |         |
| The Nervous System<br>Volume 2—The Clinical<br>Neurosciences                                                                                                                                | D. B. Tower<br>(Editor)                                                | New York<br>Raven Press<br>1976                            | 556   | \$15.00 |
| <i>Fifty-one articles overview the advances in clinical neurology that have taken place in the last quarter of a century.</i>                                                               |                                                                        |                                                            |       |         |
| The Nervous System<br>Volume 3—Human Communi-<br>cation and Its Disorders                                                                                                                   | D. B. Tower<br>(Editor)                                                | New York<br>Raven Press<br>1976                            | 564   | \$15.00 |
| <i>Third of three volumes marking the 25th Anniversary of the National Institute of Neurological and Communicative Disorders and Stroke. Covers hearing and speech.</i>                     |                                                                        |                                                            |       |         |
| Atlas of Electroencephalography<br>in Coma and Cerebral Death                                                                                                                               | D. R. Bennett<br>J. R. Hughes<br>J. Koren<br>J. K. Merlis<br>C. Sutter | New York<br>Raven Press<br>1976                            | 254   | \$55.00 |
| <i>Reference atlas with explanatory notes; for electroencephalographers and others who take care of critically ill patients.</i>                                                            |                                                                        |                                                            |       |         |
| Intensive Care                                                                                                                                                                              | J. J. Skillman                                                         | Boston<br>Little, Brown<br>1975                            | 609   | PNS     |
| <i>Sixteen contributors discuss administrative aspects, physiologic management, and clinical problems.</i>                                                                                  |                                                                        |                                                            |       |         |
| Neurological Anaesthesia<br>Second edition                                                                                                                                                  | A. R. Hunter                                                           | Philadelphia<br>J. B. Lippincott<br>1976                   | 344   | \$35.00 |
| <i>A new book under an old title—one third physiology and pharmacology, two thirds technique.</i>                                                                                           |                                                                        |                                                            |       |         |
| Recent Advances in Critical<br>Microcirculatory Research                                                                                                                                    | D. H. Lewis                                                            | Basel (Switzerland)                                        | 378   | \$57.00 |
| <i>Selected communications to the 8th European Conference, with invited symposia on capillary permeability, vascular transport, ocular microcirculation, and clinical microcirculation.</i> |                                                                        |                                                            |       |         |
| Principles and Practice of Respi-<br>ratory Therapy<br>Second edition                                                                                                                       | J. A. Young<br>D. Crocker                                              | Chicago<br>Year Book Medical Publish-<br>ers, Inc.<br>1976 | 777   | PNS     |
| <i>Advances of the past five years, integrated into a text covering basic theory and clinical practice.</i>                                                                                 |                                                                        |                                                            |       |         |
| Intensive Therapy<br>(Paperback)                                                                                                                                                            | J. C. Stoddart                                                         | Oxford<br>Blackwell Scientific<br>Publications<br>1975     | 198   | \$13.50 |
| <i>An outline of the administrative and clinical problems of intensive care.</i>                                                                                                            |                                                                        |                                                            |       |         |
